# Supplementary material
Source: Springer Nature journal article supplement (https://www.springermedizin.de/resource/supplementary/12889_2007_1064_MOESM2_ESM.pdf/9503252)
Supplement: MOESM2 [file 9503252]

### **Long-term risk-avoidance**

- Protective practices
- Protective strategies
- Indigenous protective tactics
- Avoid or overcome obstacles to reduced risk (for example, how to convince sexual or injection partners who want to engage in unsafe behaviors to act more safely; controlling addiction that might make it harder to stay safe; changing the norms of one's social network; helping sex partners avoid or cure STIs)
- Engage in other forms of goal-directed action that reduce the probability of being in high-risk situations

*Minimizes frequency  
of high-risk events*

### **Moments of risk**

- Behaviors
- Risk networks
- Settings such as shooting galleries or group sex events (for HIV)
- STIs or other sources of high susceptibility to infection (for HIV)
- Risk behaviors with partners when they are highly' infective
